# Supplementary material
Source: publisher figshare collection journal article supplement (https://acs.figshare.com/ndownloader/files/3839308)
Supplement: Supplementary file 1 [file 3839308]

## SUPPORTING INFORMATION

### **Redox- and pH-sensitive polymeric micelles based on poly( $\beta$ -amino ester)-grafted-disulfide methylene oxide poly(ethylene glycol) for anticancer drug delivery**

*Quang Nam Bui,<sup>†</sup> Yi Li,<sup>†</sup> Moon-Sun Jang,<sup>#</sup> Dai Phu Huynh,<sup>§</sup> Jung Hee Lee,<sup>#</sup> and Doo Sung Lee<sup>†,\*</sup>*

<sup>†</sup>Theranostic Macromolecules Research Center, School of Chemical Engineering, Sungkyunkwan University, Suwon 440-746, Republic of Korea

<sup>#</sup>Department of Radiology, Samsung Medical Center, Sungkyunkwan University School of Medicine and Center for Molecular and Cellular Imaging, Samsung Biomedical Research Institute, Seoul, 135-710, Republic of Korea

<sup>§</sup>Faculty of Materials Technology, National Key Lab. of Polymer and Composite Materials, HoChiMinh University of Technology, Vietnam National University, HoChiMinh City, Vietnam

#### **Corresponding Author**

\* E-mail address: [dslee@skku.edu](mailto:dslee@skku.edu) (D.S. Lee), Tel.: +82 31 290 7267, Fax: +82 31 292 8790.

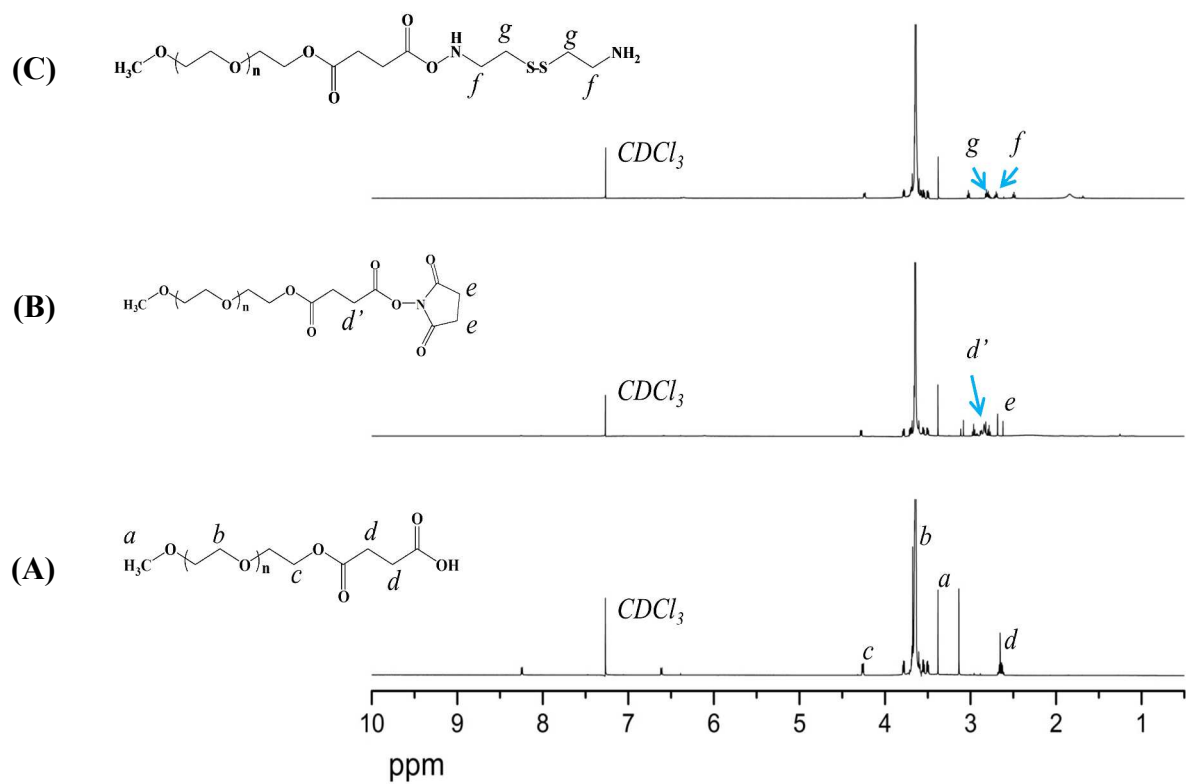

**Figure S1.**  $^1\text{H}$ -NMR spectra of MPEG-COOH (A), NHS-activated MPEG (B), MPEG-Cystamine (C)

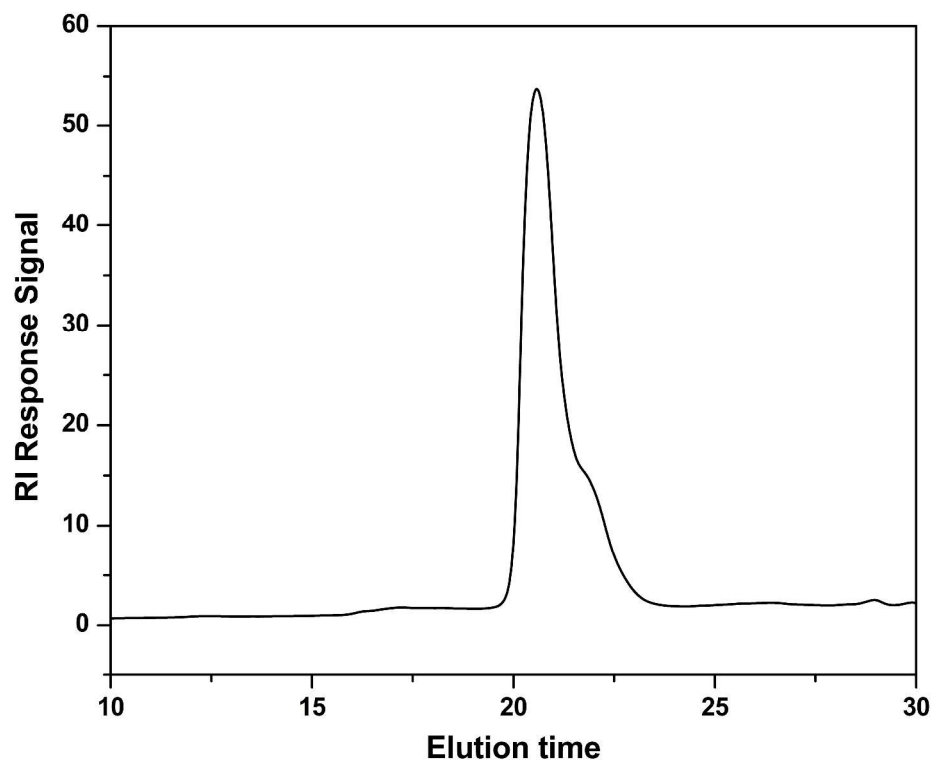

**Figure S2.** GPC trace of PAE-g-DSMPEG.
